# Supplementary material
Source: PubMed Central journal article supplement (PMC6168300)
Supplement: 10.1194_D087429_jlr.D087429-1.pdf [file 10.1194_D087429_jlr.D087429-1.pdf]

*Supplementary Information*

**An LC-MS/MS workflow to characterize 16 regio- and stereoisomeric trihydroxyoctadecenoic acids (TriHOMEs)**

David Fuchs<sup>1</sup>, Mats Hamberg<sup>1</sup>, C. Magnus Sköld<sup>2,3</sup>, Åsa M. Wheelock<sup>2</sup>, Craig E. Wheelock<sup>1</sup>

<sup>1</sup>Division of Physiological Chemistry II, Department of Medical Biochemistry and Biophysics, Karolinska Institutet, Stockholm, Sweden

<sup>2</sup>Respiratory Medicine Unit, Department of Medicine Solna and Center for Molecular Medicine (CMM), Karolinska Institutet, Stockholm, Sweden

<sup>3</sup>Lung-Allergy Clinic, Karolinska University Hospital Solna, Stockholm, Sweden

Corresponding author:

Craig E. Wheelock

Division of Physiological Chemistry II,  
Department of Medical Biochemistry and Biophysics,  
Karolinska Institutet, 17177 Stockholm, Sweden,

E-mail: craig.wheelock@ki.se

**Supplemental Table S1:** Median concentrations of TriHOME isomers in female healthy never smokers, healthy smokers, smoking COPD patients and COPD patients that are ex-smokers

|                  |        | median concentration (interquartile range) [ng/mL] |                       |                       |                       |
|------------------|--------|----------------------------------------------------|-----------------------|-----------------------|-----------------------|
|                  |        | n=20                                               | n=19                  | n=11                  | n=6                   |
| Compound*        |        | healthy never smokers                              | healthy smokers       | COPD smokers          | COPD ex-smokers       |
| 9,10,13-TriHOMEs | 5 a/b  | 0.009 (0.012 - 0.008)                              | 0.008 (0.011 - 0.006) | 0.015 (0.018 - 0.012) | 0.010 (0.012 - 0.007) |
|                  | 6 a/b  | 0.011 (0.013 - 0.009)                              | 0.009 (0.011 - 0.007) | 0.018 (0.020 - 0.014) | 0.011 (0.013 - 0.009) |
|                  | 7 a/b  | 0.021 (0.026 - 0.018)                              | 0.017 (0.023 - 0.014) | 0.028 (0.035 - 0.014) | 0.021 (0.026 - 0.019) |
|                  | 8 a/b  | 0.018 (0.023 - 0.013)                              | 0.016 (0.025 - 0.013) | 0.026 (0.042 - 0.21)  | 0.018 (0.028 - 0.017) |
|                  | sum    | 0.059 (0.067 - 0.051)                              | 0.049 (0.070 - 0.041) | 0.088 (0.111 - 0.071) | 0.060 (0.079 - 0.054) |
| 9,12,13-TriHOMEs | 9 a/b  | 0.007 (0.009 - 0.006)                              | 0.006 (0.008 - 0.004) | 0.011 (0.013 - 0.010) | 0.007 (0.009 - 0.005) |
|                  | 10 a/b | 0.011 (0.014 - 0.006)                              | 0.011 (0.013 - 0.010) | 0.020 (0.021 - 0.017) | 0.013 (0.014 - 0.012) |
|                  | 11 a/b | 0.013 (0.017 - 0.012)                              | 0.015 (0.013 - 0.011) | 0.019 (0.027 - 0.016) | 0.013 (0.017 - 0.012) |
|                  | 12 a/b | 0.016 (0.020 - 0.012)                              | 0.017 (0.022 - 0.013) | 0.024 (0.035 - 0.020) | 0.015 (0.022 - 0.015) |
|                  | sum    | 0.047 (0.059 - 0.042)                              | 0.049 (0.061 - 0.039) | 0.074 (0.093 - 0.063) | 0.049 (0.062 - 0.042) |

\*See Figure 1 for compound structure and nomenclature

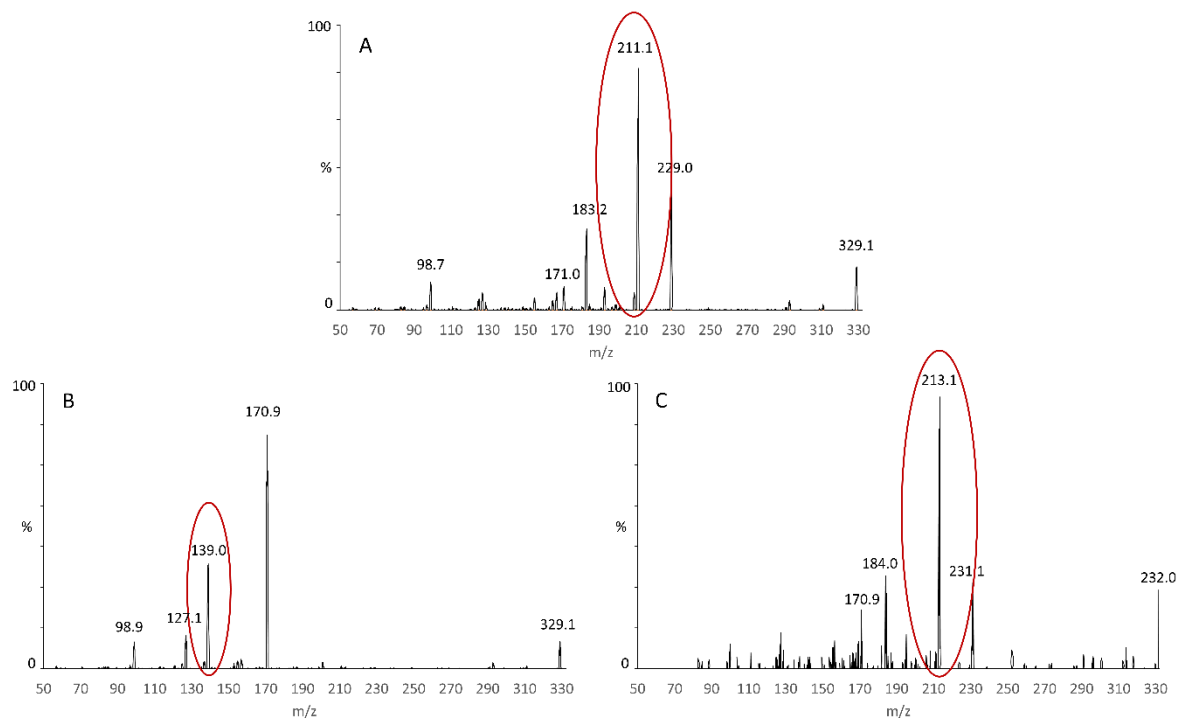

**Supplemental Figure S1:** Product ion scans of A: 9,12,13-TriHOME (parent mass: 329.1, CE: 25 eV), B: 9,10,13-TriHOME (parent mass: 329.1, CE: 21 eV) and C: [11,12,13-<sup>13</sup>C<sub>3</sub>] 9,12,13-TriHOME internal standard (parent mass: 332.1, CE 25 eV). Red circles indicate fragmentation ions used for MRM scans.

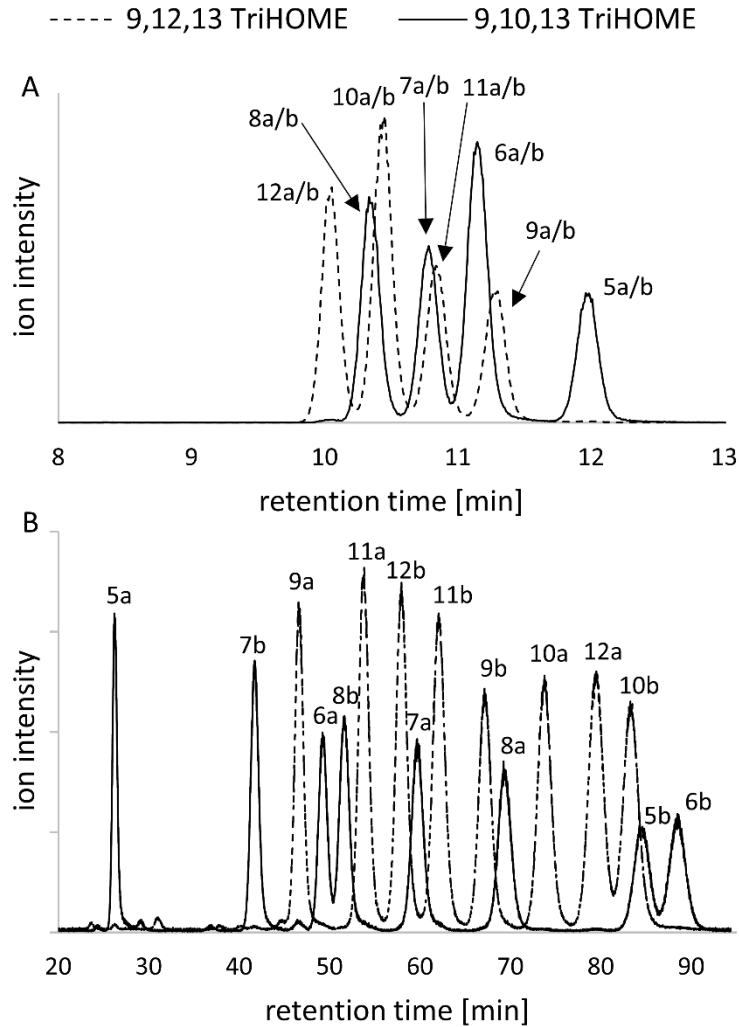

**Supplemental Figure S2:** Overlays of chromatograms of a solution containing TriHOME standard mix A and standard mix B. MS/MS transition for 9,10,13-TriHOME:  $m/z$  329.1  $\rightarrow$  139.0; MS/MS transition for 9,12,13-TriHOME:  $m/z$  329.1  $\rightarrow$  211.0. Compound nomenclature is provided in Figure 1. A: Reversed phase UHPLC-MS/MS chromatograms, B: Chiral LC-MS/MS chromatograms

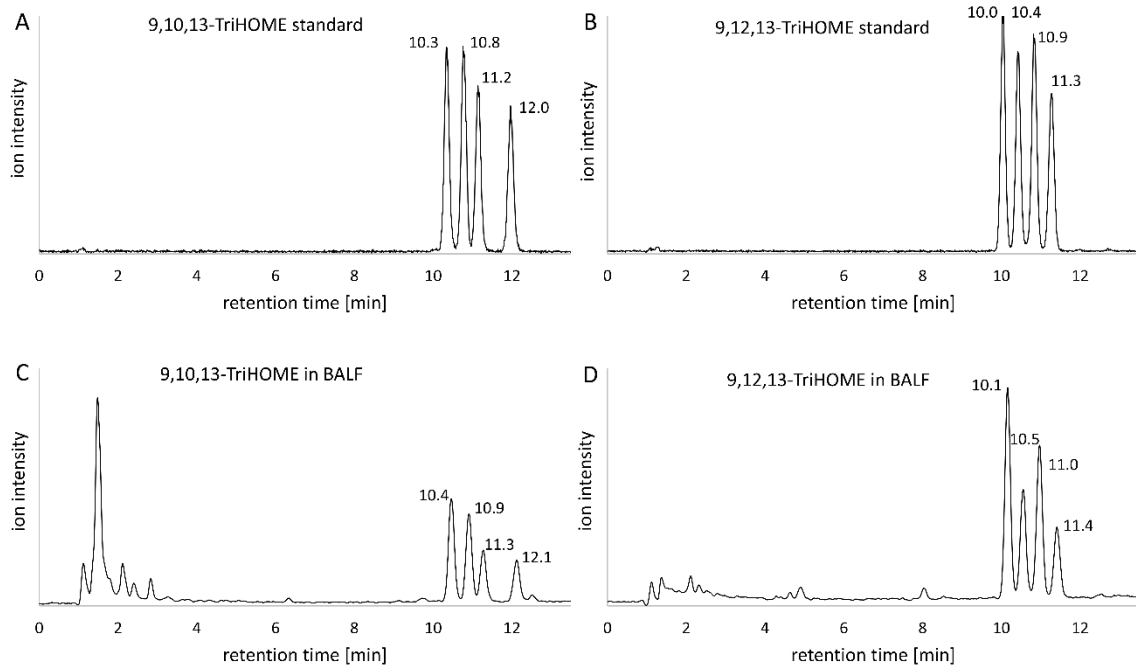

**Supplemental Figure S3:** Reversed phase UHPLC-MS/MS chromatograms of TriHOME standards (A and B) and chromatograms of TriHOMEs in a representative human BALF sample (C and D). Exact retention times are indicated above the respective TriHOME peaks. MS/MS transition of 9,10,13-TriHOME:  $m/z$  329.1  $\rightarrow$  139.0, MS/MS transition of 9,12,13-TriHOME:  $m/z$  329.1  $\rightarrow$  211.0.

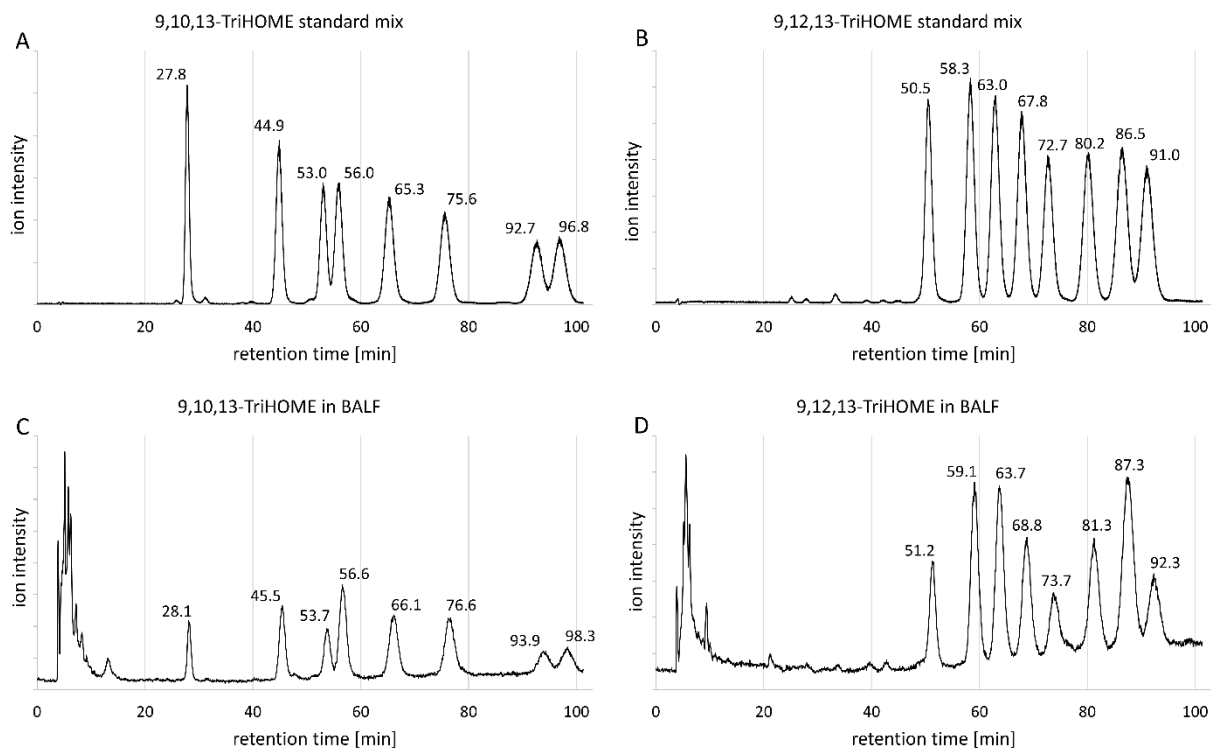

**Supplemental Figure S4:** Chiral LC-MS/MS chromatograms of TriHOME standards (A and B) and chromatograms of TriHOMEs in a representative human BALF sample (C and D). Exact retention times are indicated above the respective TriHOME peaks. MS/MS transition of 9,10,13-TriHOME:  $m/z$  329.1  $\rightarrow$  139.0, MS/MS transition of 9,12,13-TriHOME:  $m/z$  329.1  $\rightarrow$  211.0.

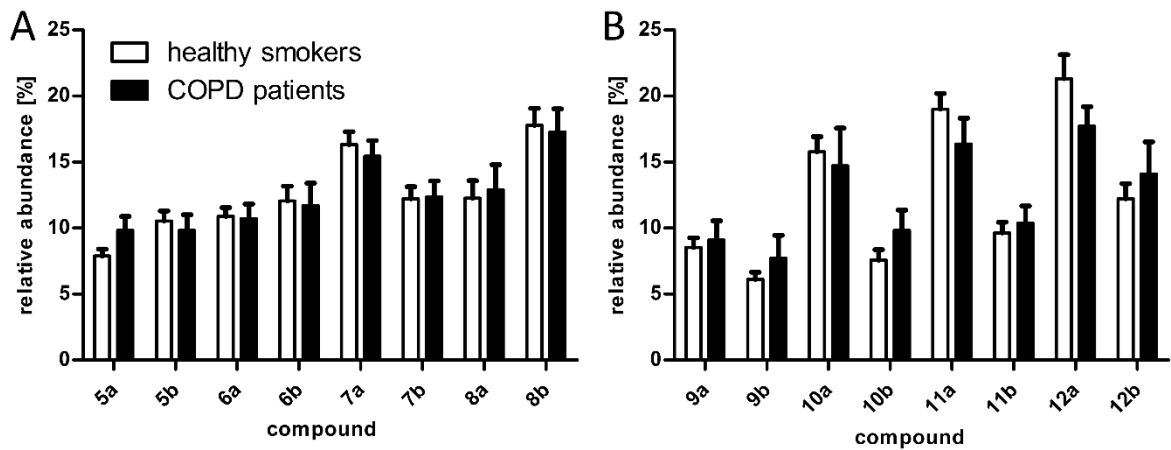

**Supplemental Figure S5:** Relative abundance of A: 9,10,13-TriHOME isomers (compounds 5a/b – 8a/b) and B: 9,12,13-TriHOME isomers (compound 9a/b – 12a/b) in healthy smokers and smoking COPD patients. Values are shown as the mean with 95 % confidence interval. healthy smokers: n = 19; smoking COPD patients: n = 11.
